# Supplementary material for: Connecting Fano interference and the Jaynes-Cummings model in cavity magnonics
Source: Springer Nature journal article supplement (doi:10.1038/s41534-021-00445-8), 2021-07-19
Supplement: MOESM1 [file 41534_2021_445_MOESM1_ESM.pdf]

1 **Supplemental Materials for:**

2 **CONNECTING FANO INTERFERENCE AND THE JAYNES-CUMMINGS**  
3 **MODEL IN CAVITY MAGNONICS**

4  
5 **Authors**

6  
7 Jakob Gollwitzer<sup>1</sup>, Lars Bocklage<sup>1,2\*</sup>, Ralf Röhlsberger<sup>1,2,3,4,5</sup>, Guido Meier<sup>6,2</sup>

8  
9 **Affiliations**

10 <sup>1</sup>Deutsches Elektronen-Synchrotron DESY, Notkestraße 85, 22607 Hamburg, Germany.

11 <sup>2</sup>The Hamburg Centre for Ultrafast Imaging, Luruper Chaussee 149, 22761 Hamburg,  
12 Germany.

13 <sup>3</sup>Institut für Optik and Quantenelektronik, Friedrich-Schiller-Universität Jena, Max-Wien-  
14 Platz 1, 07743 Jena, Germany

15 <sup>4</sup>Helmholtz Institut Jena, Fröbelstieg 3, 07743 Jena, Germany

16 <sup>5</sup>Helmholtz Centre for Heavy Ion Research (GSI), Planckstr. 1, 64291 Darmstadt, Germany

17 <sup>6</sup>Max-Planck Institute for the Structure and Dynamics of Matter, Luruper Chaussee 149,  
18 22761 Hamburg, Germany.

19  
20  
21 \*Corresponding author [lars.bocklage@desy.de](mailto:lars.bocklage@desy.de).

37 **Supplementary Methods**

38

39 Experimental Setup

40 The experimental set-up is shown in Supplementary Figure 1 and the absolute value of the  
41 reflectivity on the detuning grid is shown in Supplementary Figure 2. A fit performed using  
42 Equation (5) is shown alongside the data. The fit parameters are shown in Supplementary Table 1.

43

44

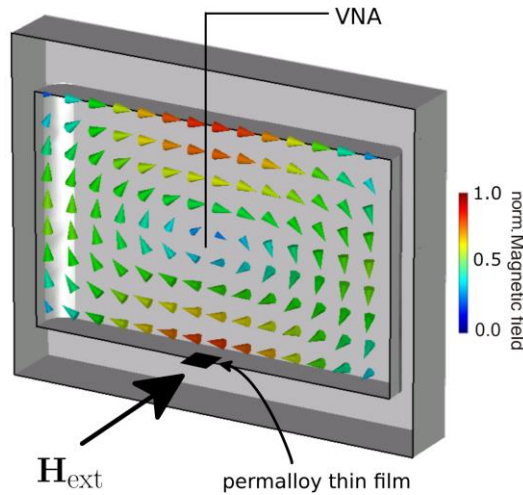

45 **Supplementary Figure 1:** Experimental setup: A permalloy film is inserted into a microwave  
46 cavity operated in the TE<sub>101</sub> mode at its resonance frequency of  $\omega_{res}/2\pi \approx 3090$  MHz. The film  
47 is placed in such a way that dynamic magnetic field of the TE<sub>101</sub> mode interacts with the magnetic  
48 dipoles of the magnetic film. The spatial magnetic field profile is calculated by a Maxwell solver  
49 and shown in the sketch. The dimensions of the cavity are 57 mm × 20 mm × 93 mm.

50

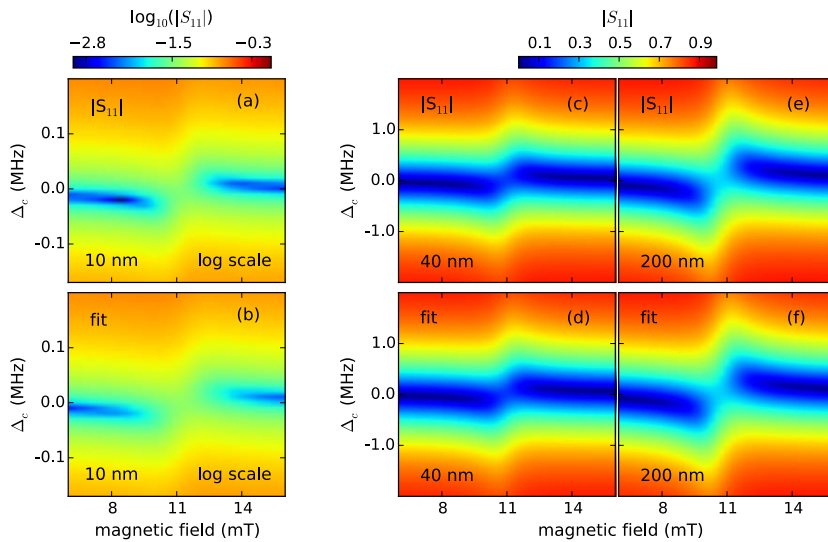

51 **Supplementary Figure 2:**  $|S_{11}|$  obtained from the microwave cavity interacting with a (a) 10 nm,  
52 (c), 40 nm, and (e) 200 nm permalloy film. The Kittel mode of the permalloy film couples to the  
53 dynamic magnetic field of the cavity and induces a bend in the reflectivity spectra. As the coupling  
54 strength  $g$  increases with increasing permalloy thickness this distortion in the spectra becomes more

55 pronounced. Subfigures (b), (d), and (e) shows a 2D fit of the  $|S_{11}|$  data with the magnitude of  
 56 Equation (5).

57

| Fit Parameter                                                                   | $t = 10$ nm | $t = 40$ nm | $t = 200$ nm |
|---------------------------------------------------------------------------------|-------------|-------------|--------------|
| Coupling constant $g/2\pi$                                                      | 2.62 MHz    | 5.30 MHz    | 8.54 MHz     |
| Magnonic damping $\gamma/2\pi$                                                  | 169 MHz     | 114 MHz     | 129 MHz      |
| Saturation magnetization $M_s$                                                  | 827 kA/m    | 830 kA/m    | 902 kA/m     |
| Anisotropy field $H_k$                                                          | 266 A/m     | 529 A/m     | 2 A/m        |
| Cavity damping $\kappa/2\pi$                                                    | 1.12 MHz    | 1.13 MHz    | 1.13 MHz     |
| Cavity resonance frequency $\omega_c/2\pi$                                      | 3.091 GHz   | 3.091 GHz   | 3.090 GHz    |
| Cooperativity $C = \left(\frac{g}{\kappa}\right) \left(\frac{g}{\gamma}\right)$ | 0.04        | 0.22        | 0.50         |

58

59 **Supplementary Table 1:** Physical quantities extracted from the 2D fit shown in Supplementary  
 60 Figure 2. The trend of the coupling constant increasing as a function of the square root of the number  
 61 of spins in the cavity is evident. The last row shows the cooperativity  $C$ .

62

### 63 Auxiliary Calculations

64

65 Steps to rewrite the square of the absolute value of the reflectivity (Equation (5)) in a generalized  
 66 Fano form (Equation (6)) include:

$$67 \quad r = 1 + \frac{\kappa}{i\Delta_c + \kappa + \frac{g^2}{i\Delta_m + \gamma}} = -1 + \frac{(\varepsilon + i)i}{\left(-\frac{\Delta_c}{\kappa} + i\right)(\varepsilon + i) - C} = \frac{\left(\varepsilon + i + C\frac{\kappa}{\Delta_c}\right)\frac{\Delta_c}{\kappa}}{(\varepsilon + i)\left(-\frac{\Delta_c}{\kappa} + i\right) - C} \quad (1)$$

68 The quantity of interest is  $|r|^2$  which may be written as

$$69 \quad |r|^2 = \frac{\left(\frac{\Delta_c}{\kappa}\right)^2}{\left(\frac{\Delta_c}{\kappa}\right)^2 + 1} \frac{\left|\varepsilon + i + C\frac{\kappa}{\Delta_c}\right|^2}{\varepsilon^2 + 1 + \frac{2C\left(\frac{\varepsilon\Delta_c}{\kappa} + 1\right) + C^2}{\left(\frac{\Delta_c}{\kappa}\right)^2 + 1}} = \sigma_0 \left( \frac{(\varepsilon + \text{Re}(\tilde{q}))^2}{\varepsilon^2 + \eta^2} + \frac{\text{Im}(\tilde{q})^2}{\varepsilon^2 + \eta^2} \right) \quad (2)$$

70 with the definitions of  $\sigma_0$ ,  $\eta$ ,  $\tilde{q}$  and  $\varepsilon$  given in the text. The term  $\eta = \sqrt{1 + f}$  is given by

71

$$72 \quad f(\varepsilon, \Delta_c, C) = \left( 2C \left( \frac{\Delta_c}{\kappa} \varepsilon + 1 \right) + C^2 \right) / \left( \frac{\Delta_c^2}{\kappa^2} + 1 \right) \quad (3)$$

73

74 which scales quadratically with the cooperativity  $C$  and linearly with  $\varepsilon$ . For low cooperativities  
 75  $\eta^2 \approx 1$ . The value of  $\eta^2$  on the cavity and magnon detuning grid is shown in Supplementary  
 76 Figure 3 for the three thickness cases of the permalloy film investigated in this study. Only for the  
 77 case  $t = 10$  nm does  $\eta^2$  not deviate strongly from unity so that the Fano interference picture remains  
 78 valid.

79

80

81

82 Line shapes at large cavity detunings

83 The role of the second term connected to the imaginary part of  $\tilde{q}$  in changing the Fano lineshape  
 84 becomes significant when the cavity detuning  $\Delta_c$  increases beyond  $\Delta_c > \kappa C$  (see Supplementary  
 85 Figure 1(c) and (e)). As  $\Delta_c$  increases, the real part  $\text{Re}(\tilde{q})$  becomes small and the imaginary part  
 86 causes  $|r|^2$  to become the division between two parabolas  $|r|^2 \approx \sigma_0(\varepsilon^2 + 1)/(\varepsilon^2 + 1 + f)$ . They  
 87 dependent on the dimensionless magnon detuning  $\varepsilon$ . In this regime the lineshape is dominated by  
 88 the additional term  $f$  which depends inversely on  $\Delta_c$  so that the divided parabolas are slightly  
 89 shifted in  $\varepsilon$  to one another. This leads to a dip in the reflectivity around  $\varepsilon = 0$ . The amplitude of  
 90 the dip is determined by the resonant cross section  $\sigma_0$  and by the magnitude of  $f$ . The dependence  
 91 of  $f$  on  $\Delta_c$  as shown in Equation (3) indicates that as  $\Delta_c \rightarrow \infty$ , the offset between the divided  
 92 parabolas decreases to zero and the amplitude of the dips becomes invisible.

93

94 The Fano Phase Picture

95 To rewrite the first term in Equation (6) into the Fano interference picture of Equation (7) one may  
 96 write

$$97 \quad \frac{|\varepsilon + \text{Re}(\tilde{q})|^2}{\varepsilon^2 + \eta^2} = \frac{|\varepsilon + i + \text{Re}(\tilde{q}) - i|^2}{|\varepsilon + i\eta|^2} = \left| 1 + \frac{\text{Re}(\tilde{q}) - i}{\varepsilon + i\eta} \right|^2 \quad (5)$$

98 Identifying the complex numbers  $\text{Re}(\tilde{q}) - i$  and  $1/(\varepsilon + i\eta)$  and writing them in terms of  
 99 magnitudes and phases via standard complex analysis yields

$$100 \quad \frac{|\varepsilon + \text{Re}(\tilde{q})|^2}{\varepsilon^2 + \eta^2} = \left| e^{i\varphi_c} + \frac{|\text{Re}(\tilde{q}) - i\eta|}{\sqrt{\varepsilon^2 + \eta^2}} e^{i\varphi_m} \right|^2 \quad (6)$$

101 with  $\varphi_c = -\arg(\text{Re}(\tilde{q}) - i\eta)$  and  $\varphi_m = \arg(\varepsilon - i\eta)$  as in Equation (7).

102

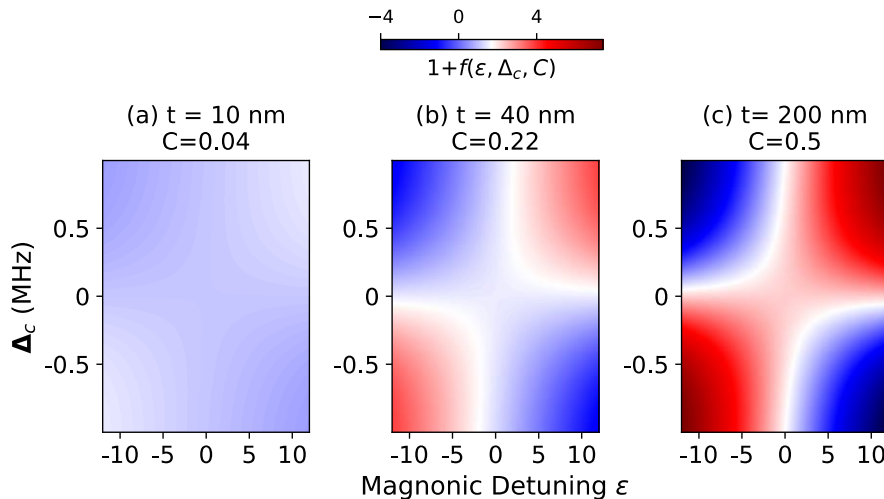103  
104

**Supplementary Figure 3.** The value of  $\eta^2 = 1 + f$  on the 2D detuning grid for the case of a (a) 10 nm, (b) 40 nm, and (c) 200 nm thick permalloy film. Parameters obtained by the fit are shown in Supplementary Table 1. For the 10 nm film, a maximum deviation from unity of  $\eta^2$  of approximately 0.3 is observed and  $\eta$  remains real on all points on the grid. Hence, the generalized Fano form (Equation (6)) may be written in the Fano interference form (Equation (7)). As the thickness and cooperativity increases ((b) and (c)), the deviation of  $\eta^2$  from unity on the detuning grid becomes more pronounced. On sections of the detuning grid on which  $\eta^2 < 0$ ,  $\eta$  becomes purely imaginary so that the generalized Fano interference picture (Equation (7)) ceases to apply.

### Difference in transmission and reflection spectra

The transmission spectrum at critical coupling is given by [9]

$$t = \frac{\kappa}{i\Delta_c + \kappa + \frac{g^2}{i\Delta_m + \gamma}}. \quad (7)$$

Following the same calculations as for the reflectivity one obtains

$$|t|^2 = \sigma_0^t \left( \frac{(\varepsilon + \text{Re}(\tilde{q}))^2}{\varepsilon^2 + \eta^2} + \frac{\text{Im}(\tilde{q})^2}{\varepsilon^2 + \eta^2} \right) \quad (8)$$

with  $\text{Re}(\tilde{q}) = 0$  and  $\sigma_0^t = (1 + \Delta_c^2/\kappa^2)^{-1}$ . A real part of zero of the complex asymmetry parameter leads to a constant cavity phase of  $\pi/2$ . Comparing the relation for the reflectivity  $\text{Re}(\tilde{q}) = C \kappa/\Delta_c$  with the vanishing real part in transmission, indicates that reflectivity and transmission features are similar for large cavity detuning and determined mainly by  $\eta^2$ .

In the interferometric picture of the Fano resonance the changes of the phases in the different channels are what determines the lineshape. Therefore, to understand this difference in the dependence of  $\text{Re}(\tilde{q})$  on the cavity detuning one has to reveal the phase relation inside the cavity. From the input-output formalism the transmission and reflection coefficients are given by [9]

$$t = \frac{d_{\text{out}}(t)}{c_{\text{in}}(t)} \quad \text{and} \quad r = \frac{c_{\text{out}}(t)}{c_{\text{in}}(t)} \quad (9)$$

that relate the incoming and outgoing waves at the ports of the cavity; port 1 ( $c_{\text{in}}, c_{\text{out}}$ ) and port 2 ( $d_{\text{out}}$ ). Those relations lead to Equations (5) and (7). These relations implicitly contain the phase information at the ports. The wave inside the cavity  $c(t)$  is described by

$$\frac{c(t)}{c_{\text{in}}(t)} = \frac{\kappa}{i\Delta_c + \kappa + \frac{g^2}{i\Delta_m + \gamma}} \quad (10)$$

which is the same as the one for the transmission. Thus, the phase inside the cavity and the one measured at the transmission port are always identical. The wave inside the cavity drives the magnon inductively whose phase is related to this excitation (the phase shift of  $\pi/2$ ). No dependence on the detuning can be expected for the transmission because the phase inside the cavity and at the transmission port are always the same and the magnon phase changes with respect to this common phase. This situation however changes for the reflectivity.

In Supplementary Figure 4(a), we plot the phases of transmission and reflection of an empty cavity ( $g = 0$ ). The magnitude of the phase difference is constant and the phase experiences a phase jump of  $\pi$  at zero detuning. Thus, for the empty cavity reflectivity and transmission have a fixed phase relation with detuning. The situation changes when the cavity is coupled to the magnon mode, see Supplementary Figure 4(b). The phase of the transmission changes only slightly with respect to the

151 empty cavity. It's noteworthy that the photon phase inside the cavity, which drives the magnon and  
 152 determines the magnons phase, is the same as for the transmission here as well. The phase of the  
 153 reflectivity is changed considerably when coupled to the magnon. In the interferometric picture, the  
 154 background phase of the cavity thus changes with respect to the magnon (or transmission) phase.  
 155 The difference of the phases reveals the same behavior as the cavity phase of the reflection in the  
 156 Fano model  $\varphi_c = -\arg(\text{Re}(\tilde{q}) - i\eta)$  with the additional phase jump. The phase difference has been  
 157 fit to  $\varphi = -\arg(C \kappa/\Delta_c - i) + \alpha$ , where  $C$  and  $\alpha$  are free parameters. The fit cooperativity  $C =$   
 158  $0.22$  is exactly the one derived from the Fano fit for the 40 nm film (see Fig. 2 in the main text).  
 159 The phase jump of  $\pi$  is fit by  $\alpha(\Delta_c)$ . The parameters  $\eta$  has been omitted as it is  $\eta \approx 1$  at zero  
 160 magnon detuning. Only at large cavity detuning the empty cavity phase difference is restored, which  
 161 also indicates that at large detuning the background phases of transmission and reflection have a  
 162 fixed relation in the Fano formula.  
 163 The difference in the real part of the asymmetry parameter in the transmission and reflection is thus  
 164 given by a relative phase change of the reflected signal with respect to the phase inside the cavity.  
 165 For the transmission both cavity phase and transmission phase are equal and no dependence on the  
 166 detuning is found. For the reflectivity the phase changes with respect to the cavity phase and  
 167 manifests as a detuning dependent  $\text{Re}(\tilde{q})$ .  
 168

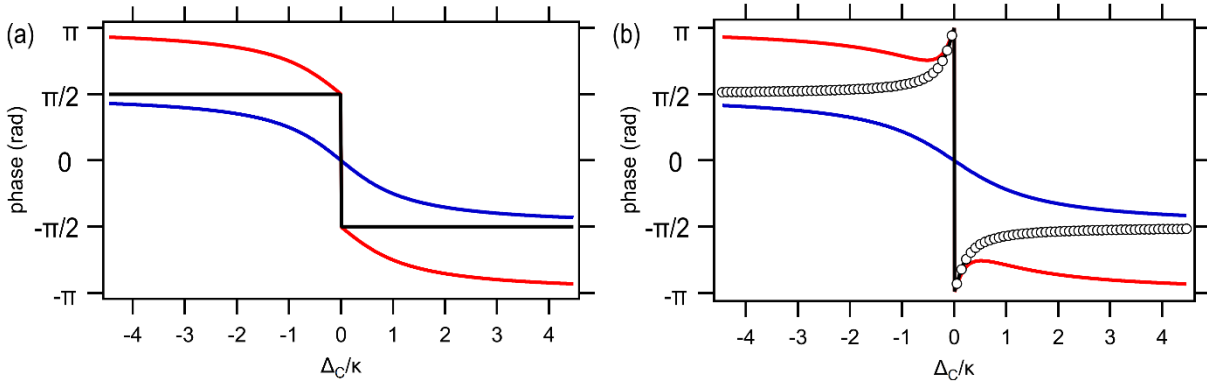

169 **Supplementary Figure 4.** Phases of transmission (blue) and reflection (red) of the cavity. (a) shows  
 170 the phases for an empty cavity. Their phase difference  $d = r - t$  is shown in black and reveals a  
 171 constant absolute value with a phase jump of  $\pi$  at zero detuning. (b) Phases for a cavity with a  
 172 magnetic film inserted at zero magnon detuning. The coupling parameters are the one of the 40 nm  
 173 film. The phase for transmission is only slightly changed while the phase in the reflectivity shows  
 174 considerable changes when approaching small detuning. Dotted curve is a fit to the phase difference  
 175 (see text).  
 176
